# Supplementary material for: A high performance IT-EOG cell based on a solid/molten Bi2O3–B2O3 composite electrolyte
Source: Royal Society of Chemistry journal article supplement (doi:10.1039/d3nj01687k), 2023-01-01
Supplement: d3nj01687k1.pdf [file d3nj01687k1.pdf]

## High Performance IT-EOG Cell Based on Solid/Molten $\text{Bi}_2\text{O}_3 - \text{B}_2\text{O}_3$ Composite Electrolyte

Polina E. Dergacheva, Sergey V. Fedorov and Valery V. Belousov\*

*Baikov Institute of Metallurgy and Materials Science, Russian Academy of Sciences, 49 Leninsky Pr., 119334 Moscow, Russian Federation, E-mail: vbelousov@imet.ac.ru*

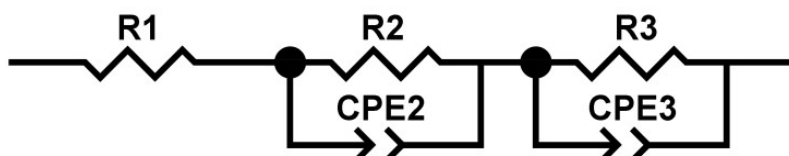

**Figure 1S.** An equivalent circuit including resistors  $R1$ ,  $R2$ , and  $R3$  and constant phase elements  $CPE2$  and  $CPE3$ .

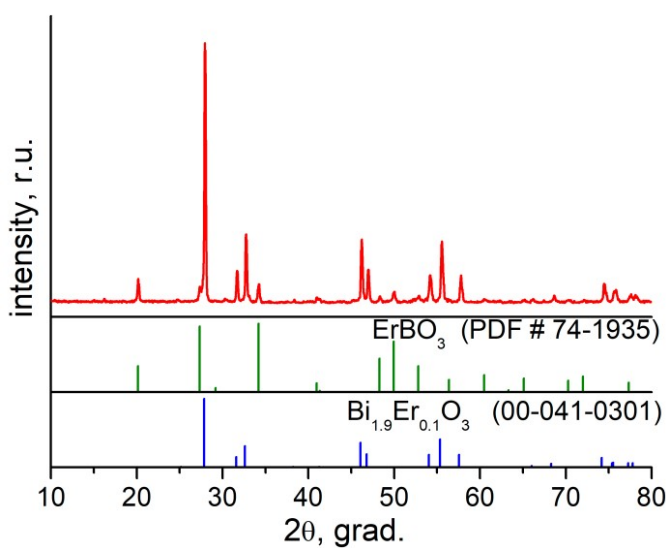

**Figure 2S.** XRD pattern of  $5\text{Bi}_{1.6}\text{Er}_{0.4}\text{O}_3 + \text{B}_2\text{O}_3$  powder mixture after heat treatment at  $740\text{ }^\circ\text{C}$  for 10 h.
